# Supplementary material for: AMPK is not required for the effect of metformin on the inhibition of BMP6-induced hepcidin gene expression in hepatocytes
Source: PubMed Central journal article supplement (PMC5627262; doi:10.1038/s41598-017-12976-2), 2017-10-04

## **AMPK is not required for the effect of metformin on the inhibition of BMP6-induced hepcidin gene expression in hepatocytes.**

Jean-Christophe Deschemin<sup>1,2,3,4,\*</sup>, Marc Foretz<sup>1,2,3,4,\*</sup>, Benoit Viollet<sup>1,2,3,4</sup> and Sophie Vaultont<sup>1,2,3,4,§</sup>

<sup>1</sup> INSERM, U1016, Institut Cochin, Paris, France

<sup>2</sup> CNRS, UMR8104, Paris, France

<sup>3</sup> Université Paris Descartes, Sorbonne Paris Cité, Paris, France

<sup>4</sup> Laboratory of Excellence GR-Ex

\* Equal contribution

§ To whom correspondence should be addressed:

Dr Sophie Vaultont, Institut Cochin, U1016,

24 Rue du Fg St Jacques, 75014, Paris, France

Telephone: 001 403 210 3938; Fax: 001 403 270 8928, e-mail : sophie.vaultont@inserm.fr

### **Legend of Figures**

#### **Supplemental Figure 1: Effect of metformin, 991 and C13 on basal hepcidin gene expression in WT and AMKPLiv KO mice.**

(A) Q-PCR analysis showing hepcidin mRNA levels in mouse primary hepatocytes treated with metformin (from 0.25 to 1mM) for 24 h), 991 (3 $\mu$ M) or C13 (1 $\mu$ M) for 24 h. RNA extraction and real-time quantification of transcripts were performed as described. mRNA expression was calculated using the  $\Delta\Delta$ Ct method and normalized to the expression of cyclophilin. Hepcidin gene expression is expressed as-fold hepcidin expression of that in non-treated hepatocytes. Error bars represent SD for n=3 samples in each group.

#### **Supplemental Figure 2: Effect of metformin on basal SHP gene expression in WT and AMPKPLiv KO mice.**

(A) Q-PCR analysis showing SHP mRNA levels in mouse primary hepatocytes treated with metformin (from 0.25 to 1mM), 991 (3 $\mu$ M) or C13 (3 $\mu$ M) for 24 h. RNA extraction and real-time quantification of transcripts were performed as described. mRNA expression was calculated using the  $\Delta\Delta$ Ct method and normalized to the expression of cyclophilin. SHP gene expression is expressed as-fold SHP expression of that in non-treated hepatocytes.

Error bars represent SD for n=3 samples in each group. Statistical significance is indicated by \* symbols (\*p < 0.05, \*\*p < 0.005, \*\*\*p < 0.0005 as compared to that of non-treated hepatocytes).

SFig 1

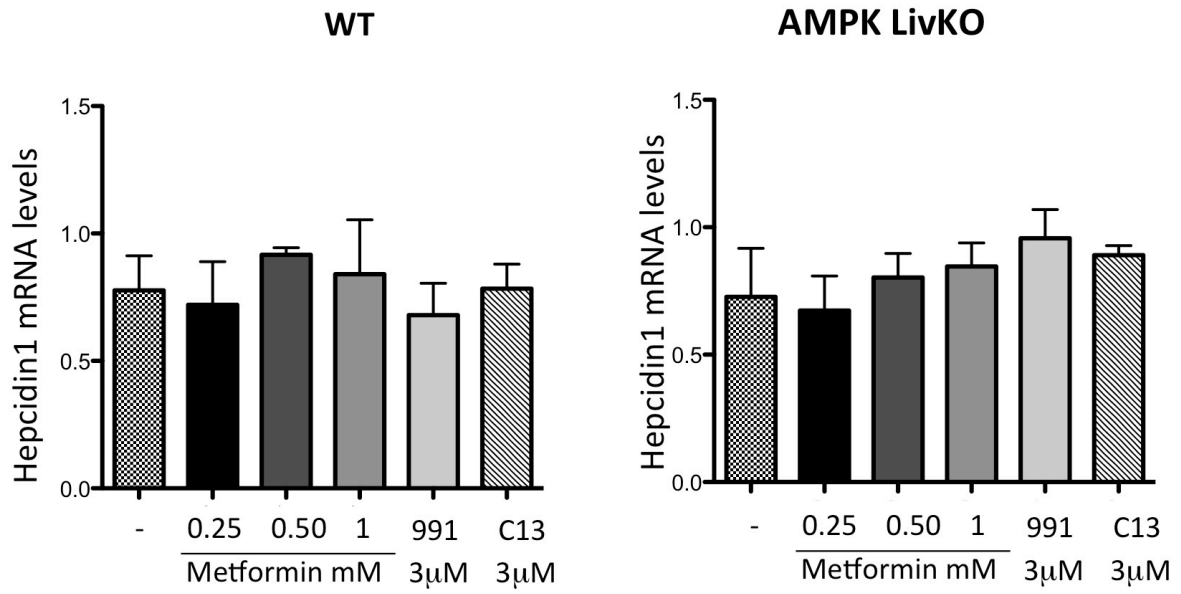

SFig 2

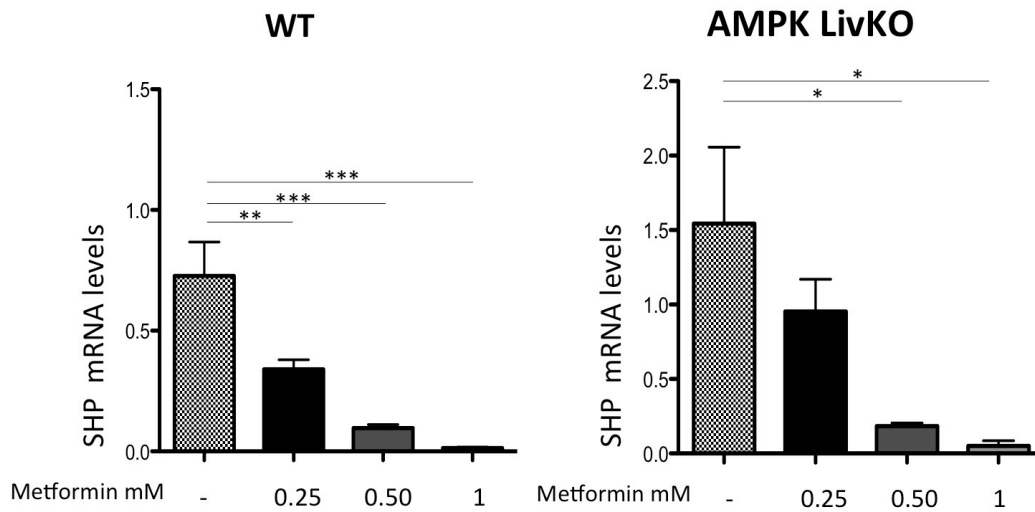

Supplement: 41598_2017_12976_MOESM1_ESM.pdf [file 41598_2017_12976_MOESM1_ESM.pdf]
